# Supplementary material
Source: HighWire-hosted journal article supplement (https://rmdopen.bmj.com/content/5/2/e001012)
Supplement: inline-supplementary-material-2 [file inline-supplementary-material-2.pdf]

**Supplemental Table 2. Repartition of vasodilators, aspirin and vitamine K antagonists intake among patients with positivity for  $\geq 1$  aPL**

| Treatments                                    | $\geq 1$ aPL (n=31)  |
|-----------------------------------------------|----------------------|
| Calcium channel inhibitors, n (%)             | 23 (74) <sup>a</sup> |
| Endothelin receptor agonist (bosentan), n (%) | 7 (23) <sup>b</sup>  |
| Low dose aspirin, n (%)                       | 20 (65) <sup>c</sup> |
| Vitamin K antagonists, n (%)                  | 6 (19) <sup>d</sup>  |

<sup>a</sup> Twelve patients with ADU (all received calcium channel inhibitors) and 11 without ADU

<sup>b</sup> All had ADU (six with Raynaud's severity score of 3 and one with a score of 4)

<sup>c</sup> Include the 7 patients with APS. Regarding only patients positive for  $\geq 1$  aPL without APS (n=24), all the 9 patients with ADU received aspirin vs 9/15 without ADU (60%)

<sup>d</sup> Correspond to 6 patients with definite APS (total APS=7, one received unfractionned heparin at the inclusion in the study)

aPL: antiphospholipid antibodies, APS: antiphospholipid syndrome; ADU: active digital ulceration
